# Supplementary material
Source: publisher figshare collection journal article supplement (https://gsapubs.figshare.com/articles/dataset/_/12344183)
Supplement: Supplementary file 1 [file 1]

Harmon, R.S., Leslie, D.L., Lyons, W.B., Welch, K.A., and McKnight, D.M., 2020, Geochemistry of contrasting stream types, Taylor Valley, Antarctica: GSA Bulletin, <https://doi.org/10.1130/B35479.1>.

## Supplemental Material

**TABLE 1.** 2010-11 Austral Summer Flow Season Sampling

- A. Andersen Creek
- B. Von Guerard

**TABLE 2.** 2010-11 Diurnal Sampling

- A. Andersen Creek - 1st Diurnal
- B. Andersen Creek - 2nd Diurnal
- C. Andersen Creek - 3rd Diurnal
- D. Von Guerard - 1st Diurnal
- E. Von Guerard - 2nd Diurnal
- F. Von Guerard - 3rd Diurnal

**TABLE 3.** Other Sampling

- A. Snow & Ice
- B. Canada Glacier Supraglacial Streams
- C. Other MDV Streams
