# Supplementary material
Source: publisher figshare collection journal article supplement (https://gsapubs.figshare.com/articles/dataset/_/12344183)
Supplement: Supplementary file 1 [file 1]

## Sheet: INDEX
	Temporal Geochemistry of Contrasting Streams Types, Taylor Valley, Antarctica
	R.S. Harmon, D.L., Leslie, W.B. Lyons, K.A. Welch, and D.M. McKnight
	SUPPLEMENTAL DATA TABLES
	TAB 1.	2010-11 Austral Summer Flow Season Sampling
		A. Andersen Creek
		B. Von Guerard
	TAB 2.	2010-11 Diurnal Sampling
		A. Andersen Creek - 1st Diurnal
		B. Andersen Creek - 2nd Diurnal
		C. Andersen Creek - 3rd Diurnal
		D. Von Guerard - 1st Diurnal
		E. Von Guerard - 2nd Diurnal
		F. Von Guerard - 3rd Diurnal
	TAB 3.	Other Sampling
		A. Snow & Ice
		B. Canada Glacier Supraglacial Streams
		C. Other MDV Streams

## Sheet: TAB 1
	SAMPLING FOR 2010-11 FLOW SEASON
	ANDERSEN CREEK			Latitude (oS)			Longitude (oE)						VON GUERARD			Latitude (oS)			Longitude (oE)
				77.6254			162.906									77.6085			163.254
	Sampling Date/Time	Discharge (L/s)	TDS (mg/L)	Alkalinity (μeq/L)	Cl (μM)	SO4 (μM)	Na (μM)	K (μM)	Mg (μM)	Ca (μM)	Si (μM)		Sampling Date/Time	Discharge (L/s)	TDS (mg/L)	Alkalinity (μeq/L)	Cl (μM)	SO4 (μM)	Na (μM)	K (μM)	Mg μM)	Ca (μM)	Si (μM)
	2010-12-07 18:04:00	nd	53.4252	353.333	185.473	91.5437	212.013	40.4667	37.4967	222.515	17.1233
	2010-12-08 18:36:00	4.1	31.6971	226.084	108.358	51.6562	117.704	24.2669	22.2571	118.713	9.465		2010-12-08 21:30:00	1.66	129.189	1298.41	532.817	134.417	569.652	87.7308	170.338	670.825	90.4267
	2010-12-09 17:36:00	86	29.8822	173.719	137.71	52.7115	144.596	22.8018	22.535	109.832	6.63167		2010-12-09 21:00:00	33.74	97.4633	1168.22	212.183	57.7396	291.643	65.3538	93.1458	474.475	82.605
	2010-12-10 17:00:00	289.84	17.1213	114.333	70.7606	27.3969	70.8565	13.7028	13.0033	60.7075	4.615
	2010-12-11 17:49:00	138.5	17.3343	129.827	62.4761	23.7302	68.1217	13.1251	12.3767	61.105	5.89333
	2010-12-12 17:30:00	203.59	15.9275	122.83	51.5944	22.9135	54.0739	12.3828	11.4529	58.1	5.59167
	2010-12-13 18:51:00	213.06	14.53	114.257	44.1324	20.6344	50.1826	11.4546	9.76917	52.74	5.685		2010-12-13 21:00:00	314.14	58.0209	975.366	126.068	33.774	171.63	45.0154	56.85	300.25	68.3017
	2010-12-14 22:49:00	187.46	15.6729	122.636	45.6958	23.151	52.8609	11.9303	11.045	58.3925	5.88		2010-12-14 21:20:00	266.74	55.0151	614.667	115.031	31.7469	165.987	44.8744	51.8458	270.275	68.275
	2010-12-15 17:57:00	56.15	23.1934	185.067	66.9944	33.5385	72.5739	17.3677	17.5254	86.515	nd		2010-12-15 20:30:00	6.96	66.2392	595.73	125.113	34.6385	176.226	46.0564	61.0917	276.3	91.405
	2010-12-16 17:13:00	52.14	29.1638	215.677	86.5324	47.9823	97.8478	22.7751	22.9517	113.653	nd		2010-12-16 21:30:00	196.31	73.1063	767.596	131.445	36.9333	195.209	55.1641	68.1167	297.325	97.7367
	2010-12-17 18:15:00	171.9	16.2184	128.419	45.5437	24.2896	54.9609	14.4208	10.9492	57.1725	6.09167
	2010-12-18 15:00:00	165.4	14.5253	90.9574	48.8282	24.8365	58.0696	15.2985	12.4733	64.025	nd
	2010-12-19 17:47:00	203.59	17.5316	128.591	52.862	30.1365	60.9478	14.5082	13.8171	63.68	6.6
	2010-12-20 17:39:00	nd	17.7566	127.545	54.1239	31.4354	63.8261	14.8292	14.5346	64.7075	nd		2010-12-20 21:00:00	342.48	53.1396	847.167	100.118	27.6031	153.639	42.7103	43.2625	257.725	69.7433
	2010-12-21 17:02:00	nd	17.6183	133.245	53.1155	29.7219	59.4913	13.8297	13.3504	61.4025	nd		2010-12-21 21:30:00	350.93	51.7833	579.228	107.33	29.7667	157.326	40.4205	43.0583	249.645	66.7167
	2010-12-22 17:28:00	nd	14.9501	115.733	43.0113	22.9979	52.3	12.7803	11.0204	53.1375	5.49833		2010-12-22 21:30:00	291.47	48.2973	566.934	98.9014	27.9417	146.091	38.7	41.5542	231.305	65.325
	2010-12-23 18:02:00	nd	14.8289	109.237	43.6028	25.6271	52.6435	12.0844	11.2825	53.8225	nd		2010-12-23 21:15:00	221.37	47.7184	528.428	99.4338	26.6906	148.896	38.7846	42.3167	229.01	64.6383
	2010-12-24 18:30:00	nd	15.2033	116.355	42.3634	25.375	52.213	12.17	11.2129	54.21	nd
	2010-12-25 17:23:00	nd	13.9711	109.121	40.8423	20.774	49.0043	12.4387	10.5521	48.845	nd
	2010-12-26 17:35:00	nd	20.4943	146.231	62.1042	36.725	73.4826	17.7349	17.2779	74.345	8.3
	2010-12-27 18:05:00	210.68	28.2592	194.326	89.2676	56.3958	82.8696	17.2182	22.0283	116.235	14.4633		2010-12-27 21:20:00	88.81	53.0493	519.654	114.073	29.9073	150.939	36.7769	41.4029	258.575	72.8617
	2010-12-28 17:11:00	95.99	28.2929	195.143	89.8254	55.6885	82.7913	17.2364	22.03	116.975	14.3883		2010-12-28 21:15:00	36.48	67.962	588.157	153.135	40.2167	190.787	45.0051	54.2583	330.575	84.0017
	2010-12-29 16:55:00	182.95	28.9966	202.335	92.5521	54.3333	80.5435	17.5669	22.3192	125.203	14.9633		2010-12-29 21:12:00	36.48	64.548	757.114	141.403	35.3625	177.265	44.7231	49.7292	313.6	81.795
	2010-12-30 17:01:00	25.76	29.3928	215.979	90.3211	51.5656	79.213	17.3408	22.255	124.12	14.7417		2010-12-30 21:16:00	2.55	80.8334	717.07	172.685	44.3667	225.896	53.2564	66.6625	400.225	91.1633
	2010-12-31 18:59:00	16.01	43.5226	287.608	140.335	91.1042	121.648	26.1026	32.7321	189.26	20.6867		2010-12-31 21:30:00	1.79	96.4488	895.225	188.2	48.1552	242.33	55.4385	71.5042	415.025	112.478
	2011-01-01 17:30:00	49.54	26.4173	188.874	84.6704	46.8438	75.9826	17.7136	20.3742	109.835	11.64		2011-01-01 21:30:00	24.63	80.7684	1019.67	189.101	48.0021	215.83	53.3462	73.5792	394.525	92.6
	2011-01-02 18:27:00	43.29	32.5297	208.272	109.924	68.6333	103.943	22.661	25.3721	134.115	16.5133		2011-01-02 21:30:00	4	81.9	933	171	42.9	203.8	47.9	70.6	373.3	110.5
	2011-01-03 17:30:00	4.1	70.1352	461.692	229.121	144.406	191.339	41.5744	57.4625	310.875	37.1633		2011-01-03 21:17:00	3.4	81.0752	895.017	164.028	41.6583	217.926	50.8385	68.5125	407.975	98.745
	2011-01-04 17:30:00	1.81	81.0162	565.16	276.406	139.24	192.826	44.6692	70.1167	383.25	31.455		2011-01-04 21:18:00	1.19	91.3099	999.335	188.099	47.1156	276.748	61.1769	80.0208	448.85	86.1017
	2011-01-05 17:30:00	49.54	28.2165	191.171	94.3408	54.0323	89.7304	19.2279	21.8446	115.05	10.325		2011-01-05 20:45:00	36.48	82.089	890.284	185.572	45.8021	225.096	56.6154	71.5292	428.4	109.868
	2011-01-06 17:40:00	7.72	41.8196	328.667	123.051	58.6979	108.826	27.1026	29.9404	184.468	19.7233		2011-01-06 21:45:00	1.19	98.2347	1075.69	199.507	48.9229	307.161	72.8692	82.8167	471.725	nd
	2011-01-07 17:30:00	2.14	66.0108	505.968	217.214	88.4479	151.504	38.2103	52.9958	313.35	29.8217
	2011-01-08 17:30:00	nd	82.4024	689.586	211.665	98.7917	152.148	50.2641	63.3083	403.95	49.19
	2011-01-09 17:30:00	nd	85.3466	735.925	188.406	101.505	150.883	59.0667	62.8708	412.25	61.0433
	2011-01-10 17:41:00	nd	23.7905	201.499	65.2225	34.2229	62.1043	16.0792	18.1288	82.905	7.64667		2011-01-10 21:10:00	50.52	81.0458	897.555	180.206	41.1667	217.452	58.5949	66.1542	397.7	0
	2011-01-11 18:09:00	nd	74.1574	648.901	185.062	76.6823	139.7	41.7513	62.5583	353.275	33.045		2011-01-11 21:10:00	1.93	31.2899	nd	207.445	47.9312	271.787	60.7769	88.8542	494.25	94.88
	2011-01-12 17:45:00	6.05	46.3555	368.375	124.375	66.126	112.283	29.2359	37.4008	209.88	17.4283		2011-01-12 22:20:00	1.66	108.955	1213.2	226.425	52.2188	322.243	71.3103	95.1333	510.7	nd
	2011-01-13 17:55:00	2.86	60.0976	494.345	163.814	76.1531	137.152	35.2513	44.1917	277.475	25.8317		2011-01-13 21:55:00	1.93	107.575	1202.01	220.197	50.9073	304.761	67.8744	92.7083	508.875	86.225
	2011-01-14 18:02:00	1.22	83.2779	668	258.93	100.972	174.826	45.0641	73.9958	397.75	30.835
	2011-01-15 17:20:00	nd	86.1512	748.163	189.254	96.474	157.37	56.8308	72.3042	418.225	50.9133
	2011-01-16 17:30:00	nd	22.6989	162.85	71.6225	39.8271	74.6348	17.85	20.1946	85.705	8.67667
	2011-01-17 17:30:00	nd	19.5938	160	56.831	30.3438	56.9348	13.9949	15.8846	65.165	6.85167
	2011-01-18 19:17:00	180.72	15.7617	117.054	50.0704	26.9365	48.4652	10.221	8.56167	61.475	5.76		2011-01-18 21:30:00	245.89	58.0588	667.001	103.051	25.1531	147.252	41.7179	44.6375	255.425	93.6317
	2011-01-19 17:08:00	79.6	23.8807	178.934	70.0761	40.3396	66.887	14.7628	13.98	101.645	8.79167		2011-01-19 21:30:00	42.48	67.2455	764.387	117.73	30.4563	168.33	43.2128	56.4875	311.525	93.6
	2011-01-20 18:22:00	47	29.8905	213.214	88.1746	53.7052	87.287	20.0351	23.7363	129.115	12.3817		2011-01-20 21:30:00	22.97	80.7149	894	142.025	35.2812	214.3	54.8077	71.3917	397.6	82.4817
	2011-01-21 17:30:00	90.93	25.2099	185.207	72.5549	45.6896	74.0957	16.8982	16.7233	102.77	10.8717
	2011-01-22 17:30:00	7.72	42.152	338.498	104.966	63.3198	98.0696	24.2854	27.7296	192.905	20.9967
	2011-01-23 17:30:00	0.93	79.512	639.442	219.885	107.51	151.739	41.2103	54.8792	394.95	31.1783
	2011-01-24 17:30:00	5.53	40.7855	310.107	117.172	65.2833	105.543	24.8472	28.6525	180.882	146.452
	2011-01-25 18:00:00	1.81	81.9848	647.53	220.006	120.156	177.265	46.8359	56.9292	392.275	36.2333

## Sheet: TAB 2
	2010-11 FLOW SEASON DIURNAL SAMPLING
	A. ANDERSEN CREEK																				B. VON GUERARD
	1st Diurnal Sampling Interval													3rd Diurnal Sampling Interval							1st Diurnal Sampling Interval													3rd Diurnal Sampling Interval
	Sampling Date/Time	Discharge (L/s)	TDS (mg/L)	Alkalinity (μeq/L)	Cl (μM)	SO4 (μM)	Na (μM)	K (μM)	Mg (μM)	Ca (μM)	Si (μM)			Date	Time	Tw (deg C)	SPC (μS/cm)	pH	DO (mg/l)		Sampling Date/Time	Discharge (L/s)	TDS (mg/L)	Alkalinity (μeq/L)	Cl (μM)	SO4 (μM)	Na (μM)	K (μM)	Mg (μM)	Ca (μM)	Si (μM)			Date	Time	Tw (deg C)	SPC (μS/cm)	pH	DO (mg/l)
	2010-12-10 11:00:00	64.54	21.5097	138.819	95.1859	33.0219	96.087	15.7133	15.55	78.735	6.10833			2011-01-03	1733	0.58	101.3	7.1	8.81		2010-12-09	4.91	108.919	1190.09	1.19009	85.5469	351.283	69.1846	116.85	568	85.9583			2010-12-31	1726	8.35	120.7	7.57	6.36
	2010-12-10 12:00:00	104.67	22.4618	149.165	94.2873	34.0969	98.1565	15.8449	16.0575	83.56	6.25333			2011-01-03	1740	0.57	101.1	7.11	8.44		2010-12-09 01:00:00	3.67	112.21	1155.84	1.15584	82.2458	347.252	69.3462	117.583	573.475	85.53			2010-12-31	1731	8.42	120.9	7.71	6.1
	2010-12-10 13:00:00	130.64	22.7114	145.388	97.7915	36.3135	101.152	16.9577	17.345	83.7525	6.70167			2011-01-03	1745	0.59	101.8	7.16	8.3		2010-12-09 02:00:00	2.83	38.7307	1207.86	1.20786	81.6906	348.543	69.5205	119.225	575.2	87.1717			2010-12-31	1736	8.4	120.9	7.72	5.92
	2010-12-10 14:00:00	180.72	23.2861	155.6	97.4986	37.7552	93.0565	17.2308	17.9279	83.3325	6.79333			2011-01-03	1750	0.59	101.6	7.18	8.28		2010-12-09 03:00:00	2.39	111.638	nd	na	82.1135	348.317	69.5385	118.342	588.15	86.795			2010-12-31	1741	8.29	120.6	7.71	5.87
	2010-12-10 15:00:00	225.16	21.6213	142.39	88.9944	35.0573	93.8652	17.3854	16.5417	76.14	6.235			2011-01-03	1755	0.62	102	7.19	8.26		2010-12-09 04:00:00	1.79	115.893	1206.72	1.20672	82.0917	343.974	68.9769	120.304	589.4	88.775			2010-12-31	1746	8.19	121	7.71	5.83
	2010-12-10 16:00:00	245.1	19.0293	124.032	79.8113	30.5333	85.7739	15.609	14.5933	66.4375	5.35			2011-01-03	1800	0.64	101	7.19	8.26		2010-12-09 05:00:00	1.42	117.215	1257.14	1.25714	82.4125	350.47	69.6615	123.504	603.3	89.07			2010-12-31	1751	8.2	120.8	7.7	5.83
	2010-12-10 17:00:00	289.84	17.1213	114.333	70.7606	27.3969	70.8565	13.7028	13.0033	60.7075	4.615			2011-01-03	1805	0.66	101.3	7.19	8.21		2010-12-09 06:00:00	1.54	118.072	1264.39	1.26439	82.55	353.87	71.1949	126.217	610.125	90.1717			2010-12-31	1754	8.21	120.8	7.7	5.83
	2010-12-10 18:00:00	289.84	15.6138	101.401	67.9718	24.9667	65.6609	11.7749	11.6429	56.805	4.27			2011-01-03	1810	0.65	101.8	7.2	8.2		2010-12-09 07:00:00	1.42	120.5	1270.36	1.27036	83.6417	349.539	70.2538	125.312	612.2	90.475			2010-12-31	1800	8.4	120.7	7.74	5.97
	2010-12-10 19:00:00	265.76	15.0612	100.467	65.1127	22.55	64.6826	11.611	10.9879	53.7275	4.20333			2011-01-03	1815	0.63	101.7	7.2	8.15		2010-12-09 08:00:00	3.4	115.852	1311.33	1.31133	81.2646	335.361	68.2769	122.025	600.45	87.91			2010-12-31	1805	8.41	120.8	7.73	5.89
	2010-12-10 20:00:00	268.39	14.7648	99.3316	62.707	22.4854	62.0826	11.0305	10.5729	52.4975	4.12167			2011-01-03	1820	0.62	101.3	7.21	8.18		2010-12-09 09:00:00	3.11	107.474	1250.5	1.2505	69.4062	300.665	63.1128	107.821	543.125	83.2567			2010-12-31	1810	8.28	121	7.72	5.84
	2010-12-10 21:00:00	260.53	14.2923	96.4596	61.2423	20.9375	66.0826	10.8764	9.93417	48.605	4			2011-01-03	1825	0.6	101.1	7.2	8.18		2010-12-09 10:00:00	2.39	105.194	1175.22	1.17522	66.7396	295.661	63.1179	103.338	520.375	81.505			2010-12-31	1815	8.05	121.2	7.69	5.82
	2010-12-10 22:00:00	242.57	13.8672	94.0627	60.569	20.0375	62.9087	10.6785	9.55083	46.6825	4.09167			2011-01-03	1830	0.58	102.1	7.2	8.12		2010-12-09 11:00:00	1.93	102.016	1158.11	1.15811	66.0344	294.596	63.3795	101.954	516.25	81.745			2010-12-31	1820	7.82	121.1	7.68	5.83
	2010-12-10 23:00:00	235.04	13.7337	95.9306	57.7014	19.5875	61.3696	9.6859	9.39875	46.16	3.75667			2011-01-03	1921	0.29	101.7	7.17	8.36		2010-12-09 12:00:00	1.79	101.022	1109.85	1.10985	64.4938	293.209	64.8974	98.6542	506.15	82.4417			2010-12-31	1825	7.65	121	7.66	5.84
	2010-12-11	176.28	13.9801	97.3948	57.9662	19.374	61.7043	10.0521	9.75917	49.495	4.04333			2011-01-03	1926	0.29	101.9	7.21	8.18		2010-12-09 13:00:00	1.79	102.352	1102	1.102	64.3417	301.604	66.4231	98.65	510.5	84.3133			2010-12-31	1830	7.49	120.9	7.64	5.87
	2010-12-11 01:00:00	150.67	14.0999	98.7976	57.7183	20.1302	57.8522	10.4079	9.96583	50.4625	4.23667			2011-01-03	1931	0.29	101.4	7.21	8.13		2010-12-09 14:00:00	1.42	103.913	1116.74	1.11674	65.7135	309.522	69.0359	103.338	512.675	86.27			2010-12-31	1845	7.07	121	7.63	5.89
	2010-12-11 02:00:00	128.7	14.0214	98.0027	59.0507	19.4125	62.5391	9.98718	9.63917	47.8325	4.385			2011-01-03	1936	0.28	101.5	7.21	8.09		2010-12-09 15:00:00	1.3	106.966	1134	1.134	66.7802	317.326	70.3333	106.771	525.675	89.2783			2010-12-31	1900	6.61	122	7.59	5.97
	2010-12-11 03:00:00	84.4	14.8154	104.74	61.1042	19.7292	64.4783	10.4336	10.5275	53.1525	4.70667			2011-01-03	1941	0.31	101.4	7.2	8.06		2010-12-09 16:00:00	1.42	105.942	1169.77	1.16977	66.1062	324.491	72.2769	103.679	524.55	89.9683			2010-12-31	1906	6.58	121.9	7.61	5.97
	2010-12-11 04:00:00	63.1	14.9623	105.674	62.4986	19.5708	61.0783	11.0977	11.0388	55.6775	4.90333			2011-01-03	1946	0.33	102.7	7.2	7.99		2010-12-09 17:00:00	1.42	105.145	1150.3	1.1503	66.1573	327.865	72.0333	105.817	517.65	92.0833			2010-12-31	1911	6.54	121.5	7.61	5.95
	2010-12-11 05:00:00	53.46	16.0641	119.933	64.7803	20.0625	61	11.2787	11.2137	57.93	5.06833			2011-01-03	1951	0.36	101.5	7.2	8.01		2010-12-09 18:00:00	1.3	107.357	1140.19	1.14019	64.4115	324.217	71.1436	105.454	517.225	88.705			2010-12-31	1916	6.49	122	7.62	5.95
	2010-12-11 06:00:00	48.26	16.0782	114.019	64.9296	21.624	70.1957	11.9487	11.4871	57.09	5.32667			2011-01-03	1956	0.4	101.5	7.2	8		2010-12-09 19:00:00	1.3	108.232	1179.05	1.17905	64.6104	327.848	72.4256	104.688	525.375	92.2633			2010-12-31	1921	6.39	121.8	7.61	5.98
	2010-12-11 07:00:00	37.4	16.2419	116.511	68.4761	21.3833	67.7522	11.7464	11.2613	56.7975	5.49667			2011-01-03	2001	0.46	103.3	7.2	7.91		2010-12-09 20:00:00	1.09	108.245	1185.33	1.18533	66.3677	339.178	74.1949	107.554	541	91.6517			2010-12-31	1926	6.29	121.5	7.6	5.99
	2010-12-11 08:00:00	35.15	16.5593	117.843	67.1493	21.8146	67.8783	11.5659	11.8788	62.2725	5.75			2011-01-03	2006	0.53	103.4	7.21	7.88		2010-12-09 21:00:00	33.74	97.4633	1168.22	1.16822	57.7396	291.643	65.3538	93.1458	474.475	82.605			2010-12-31	1931	6.19	122.1	7.59	5.98
	2010-12-11 09:00:00	31.88	16.8136	118.692	70.1831	21.9375	70.3522	12.0959	12.1704	62.22	5.79667			2011-01-03	2011	0.6	102.6	7.21	7.89		2010-12-09 22:00:00	59.89	90.7811	1066.49	1.06649	50.9542	267.23	62.9487	84.5542	441.45	80.395			2010-12-31	1940	5.98	121.9	7.59	6.02
	2010-12-11 10:00:00	30.82	17.0901	121.156	70.9803	22.6333	71.0478	11.8656	12.4979	62.56	5.97833			2011-01-03	2016	0.67	102.6	7.22	7.85		2010-12-09 23:00:00	17.67	87.9825	995.333	0.995333	48.5094	248.504	59.5615	83.4833	419.45	77.5033			2010-12-31	1945	5.86	122	7.58	6.04
	2010-12-11 11:00:00	32.96	17.6313	126.921	73.7183	22.6969	71.3913	12.1379	12.6538	64.23	6.27			2011-01-03	2021	0.69	102.6	7.22	7.9															2010-12-31	1950	5.76	121.7	7.56	6.06
														2011-01-03	2026	0.67	103.3	7.22	7.84															2010-12-31	1955	5.69	122.6	7.57	6.05
														2011-01-03	2031	0.65	103.6	7.23	7.82															2010-12-31	2000	5.66	121.6	7.57	6.08
	2nd Diurnal Sampling Interval													2011-01-03	2036	0.64	103.5	7.23	7.83		2nd Diurnal Sampling Interval													2010-12-31	2005	5.63	122.6	7.59	6.05
														2011-01-03	2041	0.63	102.9	7.23	7.84															2010-12-31	2015	5.59	121.8	7.6	6.19
	2011-01-04 10:30:00	2.86	92.1705	625.583	323.239	323.239	213.657	51.641	79.1792	440.3	nd			2011-01-03	2046	0.62	103.6	7.23	7.82		2010-12-31 21:30:00	1.79	96.4488	895.225	0.895225	48.1552	242.33	55.4385	71.5042	415.025	112.478			2010-12-31	2020	5.48	121.8	7.59	6.14
	2011-01-04 13:30:00	3.25	103.546	670.432	420.563	420.563	237.291	54.4179	93.5917	499.375	36.6117			2011-01-03	2051	0.59	104.4	7.23	7.77		2011-01-01 09:30:00	1.3	89.1671	1128.58	1.12858	49.6573	246.017	53.2462	86.4917	434.825	94.6			2010-12-31	2025	5.38	122.7	7.57	6.09
	2011-01-04 17:30:00	1.81	81.0162	565.16	276.406	276.406	192.826	44.6692	70.1167	383.25	31.455			2011-01-03	2056	0.58	105.7	7.24	7.71		2011-01-01 13:30:00	1.42	86.6002	986.129	0.986129	47.7313	251.087	59.5051	80.0875	415.625	nd			2010-12-31	2030	5.25	121.9	7.56	6.14
	2011-01-04 21:30:00	1.53	80.1865	525.266	293.577	293.577	198.296	45.159	68.3875	379.775	32.305			2011-01-03	2101	0.57	106.2	7.25	7.65		2011-01-01 17:30:00	1.66	91.4855	955.785	0.955785	49.7594	259.613	61.8308	82.3458	431.95	nd			2010-12-31	2035	5.17	122.3	5.57	6.13
	2011-01-05 01:30:00	4.1	59.0593	393.135	204.851	204.851	153.817	33.9744	45.8333	269.325	21.7283			2011-01-03	2106	0.56	105.4	7.24	7.72		2011-01-01 21:30:00	24.63	80.7684	1019.67	1.01967	48.0021	215.83	53.3462	73.5792	394.525	92.6			2010-12-31	2040	5.09	122.6	7.57	6.12
	2011-01-05 05:30:00	2.14	62.5199	440.601	207.738	207.738	157.296	37.2949	49.5042	294.45	23.9883			2011-01-03	2111	0.55	107.1	7.25	7.64		2011-01-02 01:30:00	22.97	68.8155	894.212	0.894212	40.4844	182.939	45.0897	62.7583	335.675	95.7			2010-12-31	2046	4.97	122.3	7.56	6.14
	2011-01-05 09:30:00	2.14	79.2476	560.815	271.468	271.468	188.626	44.1564	65.7	376.3	29.2383			2011-01-03	2116	0.53	106.8	7.24	7.75		2011-01-02 05:30:00	8.5	75.4024	841.86	0.84186	42.8948	194.443	45.1564	70.1292	368.2	nd			2010-12-31	2051	4.85	122.9	7.56	6.14
	2011-01-05 13:30:00	8.92	62.1502	453.939	202.065	202.065	157.174	36.0949	50.2417	290.875	22.6067			2011-01-03	2120	0.51	106.1	7.25	7.7		2011-01-02 09:30:00	3.96	81.5918	932.755	0.932755	42.9844	203.778	47.9128	70.6417	373.325	110.532			2010-12-31	2056	4.73	122.2	7.55	6.19
	2011-01-05 17:30:00	49.54	28.2165	191.171	94.3408	94.3408	89.7304	19.2279	21.8446	115.05	10.325			2011-01-03	2125	0.47	107.4	7.26	7.64		2011-01-02 13:30:00	2.55	83.957	949.732	0.949732	45.5052	226.257	56.2923	71.3	383.825	104.127			2010-12-31	2101	4.61	122	7.55	6.18
	2011-01-05 21:30:00	9.55	38.3188	266.379	123.023	123.023	111.404	24.9213	28.3417	165.685	16.3417			2011-01-03	2130	0.44	108.3	7.25	7.61		2011-01-02 17:30:00	131.41	80.4306	898.802	0.898802	47.1771	216.496	53.6564	71.2625	383.075	95.425			2010-12-31	2106	4.47	122.3	7.54	6.2
														2011-01-03	2135	0.42	106.6	7.25	7.68		2011-01-02 21:30:00	27.97	66.1637	746.667	0.746667	36.0448	171.509	42.5333	57.6375	310.05	100.965			2010-12-31	2111	4.38	122.1	7.54	6.22
														2011-01-03	2140	0.4	108.7	7.26	7.58		2011-01-03 01:30:00	5.66	76.5683	875.167	0.875167	40.3635	189.357	44.559	66.825	351.75	102.328			2011-01-01	809	0.12	130.7	7.57	6.84
														2011-01-03	2145	0.38	108	7.26	7.62		2011-01-03 09:30:00	2.39	83.3012	949.967	0.949967	41.8948	206.543	46.9282	74.7125	385.925	90.83			2011-01-01	814	0.17	130.6	7.52	6.75
														2011-01-03	2150	0.34	108.8	7.26	7.61		2011-01-03 13:30:00	6.96	76.2617	872.411	0.872411	38.8563	185.865	43.7949	67.0125	351.1	85.995			2011-01-01	819	0.21	130.6	7.58	6.72
														2011-01-03	2155	0.33	109.7	7.27	7.53		2011-01-03 21:17:00	3.4	81.0752	895.017	0.895017	41.6583	217.926	50.8385	68.5125	407.975	98.745			2011-01-01	824	0.26	130.6	7.6	6.68
														2011-01-03	2200	0.32	109.8	7.27	7.52															2011-01-01	829	0.29	131.1	7.57	6.66
														2011-01-03	2205	0.3	109.7	7.27	7.54															2011-01-01	834	0.35	130.2	7.59	6.63
														2011-01-03	2210	0.28	109.6	7.27	7.54															2011-01-01	839	0.43	130	7.59	6.62
														2011-01-03	2215	0.27	109.9	7.27	7.51															2011-01-01	844	0.49	130	7.61	6.61
														2011-01-03	2220	0.26	109.9	7.27	7.51															2011-01-01	849	0.55	129.7	7.61	6.6
														2011-01-03	2224	0.26	109.8	7.28	7.49															2011-01-01	854	0.64	129.2	7.61	6.59
														2011-01-03	2229	0.23	110.4	7.27	7.5															2011-01-01	900	0.71	129	7.62	6.55
														2011-01-03	2234	0.22	110.5	7.28	7.49															2011-01-01	905	0.84	128.7	7.61	6.6
														2011-01-03	2239	0.21	109.8	7.28	7.52															2011-01-01	910	0.95	129	7.61	6.57
														2011-01-03	2244	0.19	111.2	7.29	7.45															2011-01-01	915	1.13	128.6	7.61	6.55
														2011-01-03	2249	0.18	110.3	7.3	7.5															2011-01-01	920	1.31	127.8	7.61	6.56
														2011-01-03	2254	0.16	111.3	7.29	7.44															2011-01-01	925	1.44	128.1	7.62	6.52
														2011-01-03	2259	0.14	110.8	7.29	7.47															2011-01-01	930	1.17	129	7.6	6.55
														2011-01-03	2304	0.14	111.1	7.29	7.45															2011-01-01	935	1.67	126.9	7.62	6.51
														2011-01-03	2309	0.12	111.6	7.29	7.43															2011-01-01	940	1.83	126.1	7.64	6.54
														2011-01-03	2314	0.11	110.9	7.29	7.44															2011-01-01	945	2.03	125.8	7.65	6.52
														2011-01-03	2319	0.1	112	7.3	7.39															2011-01-01	950	2.17	125.7	7.65	6.51
														2011-01-04	715	0.24	130.6	7.65	6.93															2011-01-01	955	2.29	125.2	7.66	6.49
														2011-01-04	719	0.25	131.8	7.64	6.55															2011-01-01	1000	2.36	124.2	7.66	6.52
														2011-01-04	724	0.26	132	7.64	6.27															2011-01-01	1006	2.31	122.8	7.67	6.66
														2011-01-04	729	0.28	133.3	7.63	6.22															2011-01-01	1011	2.25	123.2	7.65	6.58
														2011-01-04	734	0.31	132.6	7.62	6.21															2011-01-01	1016	2.23	122.6	7.64	6.59
														2011-01-04	739	0.33	131	7.62	6.3															2011-01-01	1021	2.36	121.7	7.65	6.61
														2011-01-04	744	0.35	132.1	7.62	6.31															2011-01-01	1026	2.41	121.1	7.65	6.61
														2011-01-04	749	0.38	132.9	7.61	6.2															2011-01-01	1031	2.46	120.7	7.66	6.63
														2011-01-04	754	0.41	130.3	7.6	6.3															2011-01-01	1036	2.55	120	7.64	6.64
														2011-01-04	759	0.44	131.3	7.62	6.26															2011-01-01	1041	2.66	120.5	7.65	6.59
														2011-01-04	804	0.46	130.9	7.62	6.23															2011-01-01	1046	2.81	120.8	7.65	6.57
														2011-01-04	809	0.49	133	7.59	6.18															2011-01-01	1051	3.01	119.7	7.66	6.58
														2011-01-04	814	0.51	130.5	7.63	6.22															2011-01-01	1056	3.28	120.1	7.66	6.56
														2011-01-04	819	0.53	132.7	7.62	6.27															2011-01-01	1101	3.45	119.7	7.68	6.53
														2011-01-04	824	0.56	131.7	7.62	6.17															2011-01-01	1104	3.55	120.2	7.68	6.5
														2011-01-04	829	0.59	133.8	7.62	6.09															2011-01-01	1500	10.16	125	7.95	5.51
														2011-01-04	834	0.61	131.5	7.61	6.1															2011-01-01	1505	10.01	125.4	7.92	5.48
														2011-01-04	839	0.62	132.8	7.61	6.13															2011-01-01	1510	9.83	125.6	7.89	5.48
														2011-01-04	844	0.64	133	7.62	6.1															2011-01-01	1515	9.66	125.7	7.89	5.48
														2011-01-04	849	0.66	131.4	7.62	6.14															2011-01-01	1520	9.46	125.6	7.87	5.51
														2011-01-04	854	0.69	133.7	7.63	6.03															2011-01-01	1525	9.25	125.9	7.87	5.51
														2011-01-04	901	0.72	132.9	7.63	6.06															2011-01-01	1530	9.03	125.9	7.86	5.52
														2011-01-04	906	0.73	131.5	7.61	6.11															2011-01-01	1535	8.79	126.2	7.85	5.56
														2011-01-04	911	0.77	131.9	7.63	6.11															2011-01-01	1540	8.6	126.4	7.83	5.57
														2011-01-04	916	0.81	132.3	7.64	6.11															2011-01-01	1545	8.46	126.6	7.84	5.59
														2011-01-04	920	0.84	132.1	7.64	6.17															2011-01-01	1550	8.35	126.7	7.83	5.6
														2011-01-04	925	0.9	132.5	7.62	6.08															2011-01-01	1555	8.28	127	7.82	5.59
														2011-01-04	930	0.96	133.6	7.63	5.99															2011-01-01	1600	8.2	127.1	7.82	5.62
														2011-01-04	935	1	132.7	7.63	6.03															2011-01-01	1606	8.19	126.9	7.81	5.62
														2011-01-04	940	1.12	133.6	7.63	6															2011-01-01	1611	8.18	127.5	7.81	5.6
														2011-01-04	945	1.19	134.1	7.63	5.99															2011-01-01	1616	8.11	127.8	7.81	5.61
														2011-01-04	950	1.24	134.2	7.64	5.99															2011-01-01	1621	7.99	127.5	7.81	5.61
														2011-01-04	955	1.29	133.7	7.63	6															2011-01-01	1626	7.85	127.4	7.81	5.63
														2011-01-04	1000	1.32	134	7.62	5.95															2011-01-01	1631	7.77	127.8	7.8	5.63
														2011-01-04	1005	1.33	133.9	7.62	5.89															2011-01-01	1636	7.79	127.6	7.8	5.62
														2011-01-04	1010	1.35	135.7	7.62	5.93															2011-01-01	1641	7.94	128.1	7.8	5.59
														2011-01-04	1015	1.39	134.9	7.63	5.97															2011-01-01	1646	8.15	128.1	7.8	5.58
														2011-01-04	1020	1.43	136.1	7.62	5.93															2011-01-01	1651	8.19	128.1	7.8	5.59
														2011-01-04	1143	1	144.8	7.63	6.45															2011-01-01	1656	8.24	128.4	7.81	5.55
														2011-01-04	1148	0.97	144.6	7.64	6.27															2011-01-01	1701	8.07	128.3	7.81	5.55
														2011-01-04	1153	1.01	145.8	7.62	6.09															2011-01-01	1706	7.99	128.4	7.8	5.56
														2011-01-04	1730	0.6	118.7	7.42	7.66															2011-01-01	1711	8.04	128.4	7.81	5.57
														2011-01-04	1741	0.6	117.6	7.43	7.68															2011-01-01	1716	8.05	127.9	7.81	5.59
														2011-01-04	1746	0.59	117.3	7.29	7.46															2011-01-01	1721	8.07	128.7	7.81	5.55
														2011-01-04	1751	0.59	115	7.33	7.48															2011-01-01	1726	8.05	128.5	7.8	5.56
														2011-01-04	2130	1.14	115.5	7.04	7.24															2011-01-01	1731	8.04	128.2	7.81	5.56
														2011-01-05	130	0.15	86.7	6.94	9.2															2011-01-01	1736	8.03	128.8	7.81	5.55
														2011-01-05	520	0	90.7	6.81	9.49															2011-01-01	1741	7.93	128.4	7.81	5.57
														2011-01-05	525	0	91.9	6.84	8.79															2011-01-01	1746	7.77	128.3	7.81	5.57
														2011-01-05	530	0	90.7	6.84	8.75															2011-01-01	1751	7.64	128.5	7.8	5.59
														2011-01-05	535	0	92.3	6.86	8.6															2011-01-01	1756	7.64	128.9	7.8	5.58
														2011-01-05	540	0	91.5	6.83	8.66															2011-01-01	1800	7.75	129	7.8	5.56
														2011-01-05	545	0	92.3	6.85	8.57															2011-01-01	2130	4.86	115.9	6.93	6.92
														2011-01-05	930	0.07	114.8	7.4	7.93															2011-01-01	2201	4.67	111.8	7.13	7.13
														2011-01-05	1031	0.69	116.7	7.57	7.27															2011-01-01	2206	4.67	110.2	7.4	7.09
														2011-01-05	1036	0.77	116.4	7.57	7.25															2011-01-01	2211	4.64	109.1	7.44	7.11
														2011-01-05	1041	0.84	115.6	7.51	7.27															2011-01-01	2216	4.57	108.4	7.43	7.12
														2011-01-05	1046	0.87	116.3	7.58	7.24															2011-01-01	2221	4.47	106.8	7.41	7.19
														2011-01-05	1051	0.92	116	7.58	7.23															2011-01-01	2226	4.37	106.5	7.41	7.21
														2011-01-05	1056	0.93	116.8	7.58	7.23															2011-01-01	2231	4.27	106	7.39	7.22
														2011-01-05	1101	0.94	116.7	7.58	7.22															2011-01-01	2236	4.17	103.6	7.38	7.33
														2011-01-05	1106	0.94	116.7	7.57	7.21															2011-01-01	2241	4.11	102.8	7.36	7.38
														2011-01-05	1111	0.98	116.2	7.58	7.22															2011-01-01	2246	4.07	103.5	7.36	7.37
														2011-01-05	1116	0.99	116.4	7.58	7.28															2011-01-01	2251	4.05	101.5	7.36	7.45
														2011-01-05	1121	0.99	116.2	7.58	7.19															2011-01-01	2256	4.02	101.7	7.36	7.45
														2011-01-05	1126	0.99	116.3	7.61	7.18															2011-01-01	2303	3.95	99.96	7.34	7.56
														2011-01-05	1130	0.99	116.5	7.6	7.17															2011-01-01	2308	3.88	99	7.33	7.55
														2011-01-05	1245	2.01	119.5	7.31	7.3															2011-01-01	2313	3.8	98.8	7.3	7.56
														2011-01-05	1250	2.28	120.3	7.38	7.14															2011-01-01	2318	3.72	97.8	7.28	7.64
														2011-01-05	1255	2.32	120.3	7.45	7.05															2011-01-01	2323	3.65	97.8	7.26	7.68
														2011-01-05	1300	2.44	119.7	7.48	6.98															2011-01-01	2328	3.57	97.4	7.24	7.71
														2011-01-05	1305	2.56	120.2	7.5	6.92															2011-01-01	2333	3.5	96.4	7.24	7.74
														2011-01-05	1310	2.61	123.2	7.5	6.78															2011-01-01	2338	3.46	96.6	7.24	7.76
														2011-01-05	1315	1.61	123.3	7.45	7.02															2011-01-01	2343	3.42	95.6	7.24	7.75
														2011-01-05	1320	1.18	112.7	7.42	7.45															2011-01-01	2348	3.39	95.6	7.24	7.79
														2011-01-05	1325	0.57	99.2	7.34	8.13															2011-01-01	2353	3.37	94.9	7.24	7.82
														2011-01-05	1330	1.26	90.5	7.25	8.48															2011-01-01	2358	3.34	94.7	7.24	7.63
														2011-01-05	1335	0.95	86.2	7.2	8.76															2011-01-02	130	2.11	92.2	7.16	8.3
														2011-01-05	1339	0.93	86.7	7.22	8.74															2011-01-02	530	0	100	8.34	8.31
														2011-01-05	1344	1.07	88.7	7.23	8.63															2011-01-02	745	1.62	98.6	7.43	8.36
														2011-01-05	1349	0.8	85.7	7.22	8.86															2011-01-02	930	3.26	108	7.58	7.4
														2011-01-05	1354	0.92	77.6	7.15	9.29															2011-01-02	1201	6.44	83.1	7	7.75
														2011-01-05	1359	1.01	72.1	7.11	9.49															2011-01-02	1206	6.43	82.2	7.03	7.78
														2011-01-05	1404	1.09	70.3	7.07	9.56															2011-01-02	1211	6.39	81	7.15	7.79
														2011-01-05	1409	1.03	69.8	7.07	9.54															2011-01-02	1216	6.35	80	7.13	7.83
														2011-01-05	1414	1.17	68.4	7.07	9.48															2011-01-02	1730	5.73	109.6	7.53	7.38
														2011-01-05	1419	1.2	67.8	7.05	9.48															2011-01-02	1756	5.26	99.1	7.36	7.46
														2011-01-05	1424	1.23	64.6	7.05	9.55															2011-01-02	1801	5.16	97.2	7.35	7.52
														2011-01-05	1429	1.37	63.1	7	9.55															2011-01-02	1806	5.06	96.3	7.27	7.61
														2011-01-05	1434	1.47	61	7.01	9.57															2011-01-02	1811	4.96	95.2	7.28	7.7
														2011-01-05	1439	1.52	56.5	6.95	9.9															2011-01-02	1816	4.8	94.1	7.2	7.75
														2011-01-05	1445	1.51	52.6	6.85	10.11															2011-01-02	1821	4.64	93.1	7.23	7.81
														2011-01-05	1450	1.57	50.5	6.91	10.14															2011-01-02	1826	4.53	92.1	7.22	7.92
														2011-01-05	1455	1.52	49.1	6.85	10.17															2011-01-02	1832	4.37	90.9	7.2	7.95
														2011-01-05	1500	1.22	47.6	6.85	10.29															2011-01-02	1837	4.25	90.4	7.17	8.15
														2011-01-05	1505	1.03	48.1	6.86	10.26															2011-01-02	1842	4.17	90.8	7.16	8.21
														2011-01-05	1510	1.04	47.4	6.86	10.3															2011-01-02	1847	4.08	89.8	7.12	8.26
														2011-01-05	1515	0.92	45.8	6.84	10.43															2011-01-02	1852	3.99	89.5	7.07	8.25
														2011-01-05	1520	0.79	45.7	6.81	10.45															2011-01-02	1857	3.9	89.6	7.12	8.24
														2011-01-05	1525	1.07	44.5	6.79	10.49															2011-01-02	1902	3.8	89.4	7.13	8.21
														2011-01-05	1530	1.15	43.8	6.76	10.52															2011-01-02	1907	3.72	89.4	7.14	8.16
														2011-01-05	1535	1.04	43.2	6.73	10.54															2011-01-02	1912	3.64	88.5	7.07	8.14
														2011-01-05	1541	1.23	42	6.69	10.62															2011-01-02	1917	3.54	88.5	7.02	8.14
														2011-01-05	1546	1.2	40.6	6.7	10.69															2011-01-02	1922	3.44	88.8	6.98	8.16
														2011-01-05	1551	1.23	39.7	6.73	10.75															2011-01-02	1927	3.36	88.8	6.95	8.2
														2011-01-05	1556	1.47	39.3	6.74	10.73															2011-01-02	1933	3.27	87.9	6.84	8.3
														2011-01-05	1601	1.6	38.3	6.76	10.79															2011-01-02	1939	3.16	88.4	6.53	8.41
														2011-01-05	1606	1.5	37.2	6.74	10.88															2011-01-02	1944	3.08	89	6.39	8.42
														2011-01-05	1611	1.37	37.2	6.7	10.9															2011-01-02	1949	2.99	88.5	6.3	8.43
														2011-01-05	1616	1.06	36.9	6.67	11															2011-01-02	1954	2.9	88.3	6.27	8.44
														2011-01-05	1621	1.05	36.3	6.67	11.05															2011-01-02	1959	2.81	88.3	6.2	8.48
														2011-01-05	1626	0.85	36.9	6.64	11.05															2011-01-02	2004	2.73	89.1	6.24	8.41
														2011-01-05	1631	0.78	36.8	6.64	11.1															2011-01-02	2009	2.66	89.3	6.2	8.45
														2011-01-05	1636	0.65	36.5	6.62	11.12															2011-01-02	2014	2.59	88.9	6.07	8.47
														2011-01-05	1641	0.54	36.9	6.62	11.12															2011-01-02	2019	2.5	88.8	6.16	8.5
														2011-01-05	1730	0.52	37.05	6.62	11.28															2011-01-02	2024	2.43	89.3	6.14	6.5
														2011-01-05	1735	0.51	40.2	6.7	10.95															2011-01-02	2029	2.35	89	6.16	8.51
														2011-01-05	1740	0.53	40.3	6.72	10.95															2011-01-02	2130	1.49	90.8	6.24	8.52
														2011-01-05	1745	0.51	41.4	6.74	10.91															2011-01-02	2135	1.4	91	6.24	8.53
														2011-01-05	1750	0.49	41.4	6.74	10.89															2011-01-02	2140	1.33	91.4	6.24	6.52
														2011-01-05	1755	0.46	42.3	6.75	10.84															2011-01-02	2145	1.24	91.7	6.25	8.55
														2011-01-05	1800	0.43	42.8	6.77	10.83															2011-01-02	2150	1.16	91.7	6.27	8.56
														2011-01-05	1805	0.4	42.1	6.77	10.86															2011-01-02	2155	1.07	91.6	6.27	8.56
														2011-01-05	1810	0.36	42.7	6.79	10.85															2011-01-02	2200	0.99	92.2	6.25	8.55
														2011-01-05	1815	0.34	42.6	6.79	10.85															2011-01-02	2205	0.93	91.6	5.86	8.62
														2011-01-05	1820	0.31	42.7	6.8	10.83															2011-01-02	2210	0.86	91.7	6	8.6
														2011-01-05	1825	0.29	43.3	6.8	10.82															2011-01-02	2215	0.81	91.8	6.15	8.6
														2011-01-05	1830	0.3	43.2	6.81	10.83															2011-01-02	2220	0.76	91.9	6.19	8.61
														2011-01-05	1914	0.15	53.2	6.76	10.59															2011-01-02	2225	0.69	92.5	6.22	9.58
														2011-01-05	1919	0.17	43.3	6.77	10.59															2011-01-02	2230	0.64	93.9	6.26	8.71
														2011-01-05	1924	0.17	43.3	6.79	10.59															2011-01-02	2235	0.57	93	6.26	8.66
														2011-01-05	1929	0.17	42.6	6.82	10.62															2011-01-02	2240	0.51	93.6	6.26	8.59
														2011-01-05	1934	0.19	43.2	6.84	10.59															2011-01-02	2245	0.44	93.1	6.28	8.63
														2011-01-05	1938	0.17	43.5	6.88	10.59															2011-01-02	2250	0.38	93.7	6.3	8.63
														2011-01-05	1943	0.17	43.3	6.88	10.55															2011-01-02	2255	0.33	93.7	6.31	8.61
														2011-01-05	1948	0.16	42.5	6.9	10.59															2011-01-02	2300	0.28	93.9	6.34	8.59
														2011-01-05	1953	0.17	41.7	6.9	10.6															2011-01-02	2305	0.22	94.3	6.34	8.58
														2011-01-05	1957	0.16	42.25	6.92	10.6															2011-01-02	2310	0.17	94.7	6.37	8.56
														2011-01-05	2000	0.17	41.8	6.93	10.61															2011-01-02	2315	0.12	94.9	6.38	8.57
														2011-01-05	2005	0.17	42.18	6.94	10.59															2011-01-02	2320	0.07	94.4	6.41	8.61
														2011-01-05	2010	0.15	42.1	6.94	10.61															2011-01-02	2325	0.02	95.3	6.43	8.58
														2011-01-05	2015	0.15	42.1	6.95	10.61															2011-01-02	2330	0	94.3	6.44	8.64
														2011-01-05	2020	0.12	42.4	6.96	10.57															2011-01-02	2336	0	95.12	6.49	8.58
														2011-01-05	2025	0.1	43.13	6.95	10.58															2011-01-02	2341	0	94.5	6.82	8.43
														2011-01-05	2030	0.1	42.7	6.98	10.57															2011-01-02	2346	0	93.6	6.95	8.54
														2011-01-05	2034	0.1	43.2	6.98	10.58															2011-01-02	2351	0	94.1	7.04	8.51
														2011-01-05	2039	0.09	43.5	7	10.53															2011-01-02	2356	0	94.2	7.1	8.42
														2011-01-05	2044	0.09	43	7.01	10.54															2011-01-03	1	0	93.2	7.13	8.42
														2011-01-05	2049	0.09	43.5	7.02	10.53															2011-01-03	6	0	94.3	7.16	8.37
														2011-01-05	2054	0.08	43.2	7.04	10.53															2011-01-03	11	0	94.7	7.21	8.38
														2011-01-05	2059	0.06	43.1	7.05	10.53															2011-01-03	16	0	94.56	7.24	8.39
														2011-01-05	2104	0.03	43.2	7.06	10.53															2011-01-03	21	0	93.9	7.22	8.46
														2011-01-05	2109	0.02	43.9	7.05	10.51															2011-01-03	26	0	94.4	7.23	8.45
														2011-01-05	2114	0.01	44	7.06	10.53															2011-01-03	31	0	96	7.24	8.38
														2011-01-05	2119	0.02	44.7	7.07	10.46															2011-01-03	36	0	96.1	7.28	6.38
														2011-01-05	2124	0.01	44.1	7.07	10.52															2011-01-03	41	0	97.7	7.3	8.29
														2011-01-05	2130	0.02	44.3	7.07	10.5															2011-01-03	46	0	97.8	7.32	8.27
														2011-01-06	725	0.64	94.1	7.27	7.07															2011-01-03	51	0	98.2	7.32	8.25
														2011-01-06	835	1.07	97.5	7.53	8.04															2011-01-03	56	0	98.6	7.33	8.2
														2011-01-06	839	1.05	96.7	7.53	8.03															2011-01-03	101	0	98.7	7.35	8.18
														2011-01-06	844	1.01	97.5	7.53	7.99															2011-01-03	106	0	99.5	7.36	8.14
														2011-01-06	849	0.99	97.9	7.53	7.95															2011-01-03	111	0	99.6	7.37	8.13
														2011-01-06	854	0.98	97.9	7.53	7.94															2011-01-03	116	0	100.1	7.38	8.1
														2011-01-06	859	0.95	97.2	7.53	7.94															2011-01-03	121	0	99	7.38	8.12
														2011-01-06	904	0.92	99.3	7.53	7.88															2011-01-03	126	0	99	7.39	8.1
														2011-01-06	909	0.91	98.8	7.53	7.9															2011-01-03	132	0	101.3	7.41	7.97
														2011-01-06	914	0.88	99.4	7.53	7.86															2011-01-03	137	0	100.3	7.41	8
														2011-01-06	919	0.89	99.4	7.55	7.85															2011-01-03	142	0	100.1	7.43	7.96
														2011-01-06	924	0.88	99.5	7.54	7.85															2011-01-03	147	0	102.2	7.44	7.84
														2011-01-06	930	0.88	100.6	7.53	7.89															2011-01-03	152	0	101.8	7.44	7.85
														2011-01-06	1120	0.87	100	7.59	7.47															2011-01-03	157	0	102.8	7.45	7.81
														2011-01-06	1125	0.85	100.3	7.47	7.72															2011-01-03	202	0	102.9	7.45	7.79
														2011-01-06	1130	0.88	100.1	7.52	7.79															2011-01-03	207	0	102.1	7.46	7.8
														2011-01-06	1135	0.91	99.9	7.53	7.83															2011-01-03	212	0	103.3	7.46	7.75
														2011-01-06	1140	0.93	100	7.54	7.8															2011-01-03	217	0	103.2	7.47	7.72
														2011-01-06	1145	0.93	100.1	7.55	7.79															2011-01-03	222	0	103.3	7.48	7.71
														2011-01-06	1150	0.88	99.7	7.55	7.82															2011-01-03	227	0	104.7	7.48	7.64
														2011-01-06	1155	0.86	99.7	7.54	7.8															2011-01-03	730	0	116.7	7.62	7.7
														2011-01-06	1200	0.88	99.6	7.55	7.8															2011-01-03	759	0	116.9	7.62	7.88
														2011-01-06	1205	0.9	99.6	7.55	7.79															2011-01-03	804	0	116.6	7.62	7.65
														2011-01-06	1310	1.27	99.5	7.59	7.72															2011-01-03	809	0	116.8	7.59	7.56
														2011-01-06	1314	1.22	99.3	7.53	7.71															2011-01-03	814	0	116.4	7.59	7.54
														2011-01-06	1319	1.19	99	7.53	7.7															2011-01-03	819	0	116.5	7.6	7.52
														2011-01-06	1324	1.16	98.8	7.52	7.73															2011-01-03	824	0	116.4	7.59	7.49
														2011-01-06	1329	1.22	98.8	7.52	7.71															2011-01-03	834	0.01	114.8	7.54	7.57
														2011-01-06	1334	1.37	99.2	7.52	7.68															2011-01-03	839	0.01	114.4	7.55	7.58
														2011-01-06	1339	1.57	99.9	7.53	7.67															2011-01-03	844	0.01	114.5	7.56	7.56
														2011-01-06	1344	1.79	98.8	7.51	7.65															2011-01-03	930	0.04	112	7.59	8.37
														2011-01-06	1349	2.44	98.5	7.52	7.58															2011-01-03	937	0.05	111.9	7.58	8.36
														2011-01-06	1354	2.61	98.3	7.55	7.58															2011-01-03	1200	0.3	107	7.49	8.58
														2011-01-06	1359	2.67	98.8	7.56	7.55															2011-01-03	1206	0.32	107.2	7.23	8.54
														2011-01-06	1404	2.85	97.5	7.54	7.57															2011-01-03	1211	0.34	106.9	7.35	8.5
														2011-01-06	1410	2.9	98.6	7.57	7.52															2011-01-03	1216	0.35	106.3	7.37	8.45
														2011-01-06	1416	2.58	98	7.57	7.67															2011-01-03	1221	0.38	106	7.36	8.46
														2011-01-06	1421	2.52	97.2	7.54	7.59															2011-01-03	1226	0.4	105.5	7.35	8.44
														2011-01-06	1426	2.34	97.7	7.57	7.56															2011-01-03	1231	0.44	105.3	7.35	8.43
														2011-01-06	1431	1.8	97.4	7.54	7.7															2011-01-03	1236	0.46	104.7	7.34	8.49
														2011-01-06	1436	2.02	96.5	7.49	7.7															2011-01-03	1241	0.54	104.5	7.34	8.5
														2011-01-06	1441	2.15	96.5	7.48	7.75															2011-01-03	1246	0.59	104.1	7.35	8.54
														2011-01-06	1446	1.82	94.6	7.52	7.82															2011-01-03	1251	0.65	103.9	7.34	8.52
														2011-01-06	1451	1.75	93.2	7.51	7.84															2011-01-03	1256	0.73	102.8	7.33	8.66
														2011-01-06	1456	1.62	91.2	7.48	7.93															2011-01-03	1330	1.81	101	7.33	8.24
														2011-01-06	1501	1.72	89.8	7.45	7.95															2011-01-03	1334	1.87	101	7.18	8.28
														2011-01-06	1506	1.55	85.9	7.44	8.16															2011-01-03	1339	2.08	101.6	7.37	8.14
														2011-01-06	1510	1.5	84.2	7.41	8.25															2011-01-03	1344	2.3	101.4	7.39	8.09
														2011-01-06	1515	1.39	80.1	7.38	8.44															2011-01-03	1349	2.51	101.3	7.41	8.04
														2011-01-06	1520	1.36	77.7	7.35	8.54															2011-01-03	1354	2.73	101.4	7.42	7.97
														2011-01-06	1525	1.32	74.4	7.35	8.7															2011-01-03	1359	2.93	101.2	7.44	7.93
														2011-01-06	1530	1.29	73.4	7.3	8.74															2011-01-03	1404	3.14	101.3	7.44	7.88
														2011-01-06	1535	1.21	69.6	7.27	8.97															2011-01-03	1409	3.39	101.6	7.45	7.8
														2011-01-06	1540	1.14	68	7.25	9.05															2011-01-03	1414	3.66	102	7.46	7.73
														2011-01-06	1545	1.05	67.5	7.23	9.08															2011-01-03	1419	3.94	101.5	7.46	7.71
														2011-01-06	1550	1.02	66.2	7.21	9.16															2011-01-03	1424	4.32	102.3	7.48	7.61
														2011-01-06	1555	1.03	64.2	7.19	9.27															2011-01-03	1430	4.6	102.4	7.51	7.54
														2011-01-06	1600	1.03	64.1	7.18	9.28															2011-01-03	1435	4.92	102	7.51	7.49
														2011-01-06	1605	1.03	65.2	7.18	9.22															2011-01-03	1440	5.15	102.6	7.51	7.42
														2011-01-06	1610	1.05	65.9	7.17	9.25															2011-01-03	1445	5.33	102.4	7.52	7.37
														2011-01-06	1750	0.64	57.9	7.19	8.42															2011-01-03	1450	5.5	102.1	7.54	7.35
														2011-01-06	1755	0.51	59.4	7.22	8.85															2011-01-03	1455	5.65	103.1	7.54	7.28
														2011-01-06	1800	0.46	60.3	7.24	9.08															2011-01-03	1500	5.79	103.2	7.55	7.24
														2011-01-06	1805	0.48	61	7.24	9.23															2011-01-03	1505	5.95	103.1	7.56	7.22
														2011-01-06	1810	0.48	61.7	7.25	9.3															2011-01-03	1510	6.13	103.3	7.57	7.18
														2011-01-06	1815	0.49	61.9	7.25	9.37															2011-01-03	1515	6.24	103.9	7.58	7.12
														2011-01-06	1820	0.51	63.4	7.25	9.37															2011-01-03	1520	6.33	103.7	7.58	7.11
														2011-01-06	1825	0.47	63	7.26	9.42
														2011-01-06	1830	0.4	64	7.28	9.4
														2011-01-06	1835	0.4	63.9	7.27	9.46
														2011-01-06	1840	0.39	65	7.28	9.4
														2011-01-06	1845	0.41	64.7	7.25	9.44
														2011-01-06	1850	0.39	64.8	7.35	9.62
														2011-01-06	1854	0.27	65.6	7.3	9.44
														2011-01-06	1859	0.22	65.6	7.3	9.43
														2011-01-06	1904	0.21	66	7.3	9.41
														2011-01-06	1909	0.24	67	7.3	9.36
														2011-01-06	1914	0.58	67.2	7.32	9.31
														2011-01-06	1919	0.34	67.9	7.33	9.31
														2011-01-06	1924	0.32	67.1	7.35	9.33
														2011-01-06	1929	0.31	67.6	7.33	9.3
														2011-01-06	1934	0.28	68	7.34	9.36
														2011-01-06	1939	0.25	67.7	7.34	9.29
														2011-01-06	1944	0.22	68.7	7.36	9.27
														2011-01-06	1950	0.22	68.6	7.36	9.25
														2011-01-06	1955	0.18	69.6	7.36	9.22
														2011-01-06	2000	0.2	69.9	7.37	9.19
														2011-01-06	2005	0.25	69.8	7.38	9.18
														2011-01-06	2010	0.28	70.5	7.38	9.15
														2011-01-06	2015	0.27	71.3	7.4	9.11
														2011-01-06	2020	0.26	70.5	7.41	9.13
														2011-01-06	2025	0.25	72	7.41	9.08
														2011-01-06	2030	0.19	71.7	7.41	9.07
														2011-01-06	2035	0.17	73	7.44	9.07
														2011-01-06	2040	0.12	73.1	7.44	9.03
														2011-01-06	2045	0.09	73.7	7.44	9
														2011-01-06	2049	0.05	73.2	7.44	9.02
														2011-01-06	2054	0	74.5	7.45	8.97
														2011-01-06	2059	-0.04	74.6	7.45	8.96
														2011-01-06	2104	-0.07	75.1	7.46	8.92
														2011-01-06	2109	-0.07	75.2	7.47	8.94
														2011-01-06	2114	-0.06	76.9	7.48	8.86
														2011-01-06	2119	-0.04	77.5	7.49	8.81
														2011-01-06	2124	-0.04	78	7.49	8.79
														2011-01-06	2129	-0.04	77.9	7.5	8.79
														2011-01-06	2134	-0.04	78.2	7.5	8.76
														2011-01-06	2139	-0.04	78.3	7.53	8.77
														2011-01-06	2145	-0.06	78.8	7.53	8.74
														2011-01-07	910	0.06	110	5.98	5.78
														2011-01-07	915	0.02	108.5	6.72	6.04
														2011-01-07	920	0.01	109.1	7.33	6.43
														2011-01-07	925	0.02	108.4	7.57	6.67
														2011-01-07	930	0.03	109.4	7.69	6.93
														2011-01-07	935	0.03	109.5	7.77	7.06
														2011-01-07	940	0.03	108.2	7.82	7.18
														2011-01-07	945	0.02	107.9	7.85	7.26
														2011-01-07	950	0.02	107	7.87	7.32
														2011-01-07	955	0.03	108.2	7.88	7.29
														2011-01-07	1000	0.04	107.9	7.89	7.29
														2011-01-07	1005	0.04	108	7.89	7.31
														2011-01-07	1010	0.04	108	7.89	7.32
														2011-01-07	1415	2.93	126.1	7.69	6.06

## Sheet: TAB 3
	A. Snow & Ice
	Lake Hoare Camp
		Date	TDS (mg/L)	Alk (μeq/L)	Cl (μM)	SO4 (μM)	Na (μM)	K (μM)	Mg (μM)	Ca (μM)	Si (μM)
	Fresh Snow	2011-01-05	5.60506	35	68.6507	6.8575	19.8648	8.87154	18.87	26.4	0.43
	Fresh Snow	2011-01-07	10.9174	70	136.997	11.4708	33.3648	14.7256	29.7454	64.365	1.14833
	Fresh Snow	2011-01-07	5.83435	102	42.4507	9.34177	63.6087	10.2026	15.1687	24.3695	0.875
	Von Guerard F6 Camp
		Date	TDS (mg/L)	Alk (μeq/L)	Cl (μM)	SO4 (μM)	Na (μM)	K (μM)	Mg (μM)	Ca (μM)	Si (μM)
	Fresh Snow	2011-01-03	nd	nd	31.8394	5.70385	35.5757	8.33	4.11242	10.8582	nd
	Fresh Snow	2011-01-03	nd	nd	27.2383	5.9699	29.1952	3.92077	4.72417	13.5768	nd
	Old Snow	2010-12-14	nd	nd	21.1944	16.5542	55.2522	7.07308	7.18833	39.605	nd
	B. Canada Glacier Supraglacial Streams
	Location	Date/Time	TDS (mg/L)	Alk (μeq/L)	Cl (μM)	SO4 (μM)	Na (μM)	K (μM)	Mg (μM)	Ca (μM)	Si (μM)
	I	2011-01-12 21:15:00	25.5779	14.6	171.566	82.6146	159.278	28.4846	27.8971	128.883	14.6
	II	2011-01-12 21:27:00	25.6141	14.0733	170.372	78.4135	161.93	31.0846	35.8004	133.222	14.0733
	III	2011-01-12 21:36:00	21.6051	12.175	150.679	66.9865	135.217	23.4436	26.645	109.245	12.175
	IV	2011-01-12 22:00:00	7.72513	4.04667	35.031	22.201	42.487	7.88564	7.20917	65.2875	4.04667
	V	2011-01-12 22:04:00	9.37771	4.15	39.3634	25.901	47	9.71949	9.33917	88.0375	4.15
	VI	2011-01-12 22:10:00	9.89893	9.17667	41.8141	25.875	48.0609	10.8677	10.2567	89.1225	9.17667
	VII	2011-01-12 22:30:00	7.14297	5.32833	32.6113	20.3198	34.5043	7.61692	5.32167	61.77	5.32833
	A	2011-01-17 16:26:00	12.3017	6.06333	86.462	38.3865	78.5565	15.2085	19.6346	56.56	6.06333
	B	2011-01-17 16:35:00	11.6046	6.08333	78.0563	36.4615	75.5391	13.7931	18.5771	54.7475	6.08333
	C	2011-01-17 16:40:00	9.91521	6.735	60.4366	32.925	63.5478	14.2238	16.0742	43.8875	6.735
	D	2011-01-17 16:47:00	28.2817	13.6817	107.896	117.229	131.822	35.0256	37.4212	174.985	13.6817
	E	2011-01-17 17:10:00	25.2668	17.2067	108.837	94.3531	122.409	34.0744	35.4067	155.68	17.2067
